1 **Seroprevalence and risk factor investigation for the exposure of *Toxoplasma gondii***  
2 **among veterinary personnel in Punjab, India**

3 R. Thakur<sup>a</sup>, R. Sharma<sup>a\*</sup>, R.S. Aulakh<sup>a</sup>, J.P.S. Gill<sup>a</sup> and B.B. Singh<sup>a,b</sup>,

4 <sup>a</sup>School of Public Health & Zoonoses, Guru Angad Dev Veterinary and Animal Sciences  
5 University, Ludhiana, Punjab 141004, India

6 <sup>b</sup>Sydney School of Veterinary Science, The University of Sydney, Camden, NSW, Australia

7

8

9

10

11

12

13

14

15

16

17 *\*Corresponding author. Tel.: +91 161 2414009*

18 *E-mail address: rajgangahar@gmail.com*

19

20 **Abstract**

21 *Toxoplasma gondii*, a globally important food borne zoonotic parasite, infects most of the  
22 warm blooded animals as well as people. One third of worlds population has been exposed to  
23 *T. gondii* at least once in their lifetime. Veterinarians and para vets are considered at risk of *T.*  
24 *gondii* exposure. As far as we are aware, occupational exposure of *T. gondii* has not been  
25 systematically explored from north India. We determined the seroprevalence of *T. gondii* in  
26 veterinary personnel and investigated associated risk factors in Punjab, India. Two hundred  
27 and five blood samples collected from veterinary personnel were tested for the presence of  
28 *Toxoplasma* IgG and IgM antibodies using ELISA. The apparent and true seroprevalence of  
29 *T. gondii* with 95% confidence interval (CI) were estimated. Information about participant  
30 demographics, and possible routes of exposure was collected using a self completed  
31 questionnaire at the time of blood collection. A veterinary person was considered  
32 *Toxoplasma* seropositive using a combination of tests in parallel, i.e. if it was positive in  
33 either IgG or IgM ELISA. A mixed effects logistic regression model was constructed to  
34 evaluate the association of demography, occupational and non-occupational factors with  
35 *Toxoplasma* seropositive status. The apparent and estimated true seroprevalence of *T. gondii*  
36 antibodies using *Toxoplasma* IgG ELISA was found to be 8.78% (95% CI 5.63% - 13.45%)  
37 and 7.36% (95% CI 4.04% - 12.29%), respectively. The apparent and estimated true  
38 seroprevalence using *Toxoplasma* IgM ELISA was found to be 0.49% (95% CI inestimable -  
39 2.71%) and 0.51% (95% CI inestimable - 2.83%), respectively. After adjusting for other  
40 variables in the final model, consuming mutton and owning a cat were associated with large  
41 odds of being *Toxoplasma* seropositive. We report that occupational risk factors are not  
42 associated with *Toxoplasma* seropositivity in veterinary personnel in Punjab, India. The  
43 seroprevalence of toxoplasmosis in veterinary personnel is comparatively low and

44 occupational exposure in veterinary personnel does not enhance risk of getting infected with

45 *T. gondii* in Punjab, India.

46 **Keywords:** Seroprevalence; *Toxoplasma gondii*; India; Risk factors; Veterinary personnel

47

48

49

50

51

52

53

54

55

56

57

58

59

60

61

62

63

64

65

66

67

68

69

70

71

72

73

74

75

76

77

78

79

80

## 81 **Introduction**

82 *Toxoplasma gondii* is an intracellular obligate apicomplexan parasite having a broad  
83 geographic and host range. This parasite is of worldwide distribution and can infect most of  
84 the warm-blooded animals including humans, mammals, and birds (Robert-Gangneux and  
85 Dardé, 2012). *Toxoplasma gondii* is the single species in the genus *Toxoplasma*, although  
86 genetic diversity within the species has been reported (Ajzenberg et al., 2002). Three well  
87 recognized parasitic stages tachyzoite, bradyzoite (contained in cyst) and oocyst have been  
88 identified. Cats act as definitive host and shed oocysts in their faeces (Frenkel et al., 1970;  
89 Dubey and Frenkel, 1972). Warm blooded animals become infected after ingesting the  
90 infective oocysts (Black and Boothroyd, 2000). Human infection could occur through  
91 consuming either food or water contaminated with oocysts or infected meat containing tissue  
92 cysts (Hill and Dubey, 2002). Human infection can be acquired postnatally or congenitally as  
93 well.

94 *Toxoplasma gondii* is a well-recognized zoonotic parasite and has been reported to be affect  
95 approximately 25% to 30% of the global human population (Flegr et al., 2014; Hussain et al.,  
96 2017). Further, HIV infected people have a high prevalence rate of toxoplasmosis (Wang et  
97 al., 2017). However, the prevalence rates vary between countries or within communities  
98 (Montoya and Liesenfeld, 2004; Pappas et al., 2009). Environment as well as livestock play  
99 an important role for parasite prevalence in humans (Robert-Gangneux and Dardé, 2012).  
100 Globally, 190,100 annual cases of congenital toxoplasmosis have been reported, leading to  
101 1.20 million Disability-adjusted life years (DALYs) and 1.5 cases of congenital  
102 toxoplasmosis per 1000 live births (Torgerson and Mastroiacovo, 2013).

103 Infections in immunocompetent hosts could range from asymptomatic to symptoms such as  
104 lymphadenitis, myocarditis or chorioretinitis (Weiss and Dubey, 2009). Congenitally  
105 acquired infections are more severe during the first trimester than in the late pregnancy.  
106 Congenital toxoplasmosis could result in slightly diminished vision to chorioretinitis,  
107 hydrocephalus, convulsions and intra-cerebral calcification (Hill and Dubey, 2002). The  
108 disease manifestation in humans could range from asymptomatic to life-threatening in  
109 individuals with impaired immune system (Weiss and Dubey, 2009). In immuno-  
110 compromised individuals, the disease leads to encephalitis and is one of major cause of death  
111 in AIDS patients (Weiss and Dubey, 2009). Studies suggest that 10 to 20% of *T. gondii*  
112 infections could result in symptomatic manifestations (Remington et al., 1960).  
113 Besides being an important food-borne pathogen, *T. gondii* is believed to be an occupational  
114 hazard among veterinary personnel, laboratory workers, slaughterhouse workers, military  
115 workers, forestry workers, and workers exposed to unwashed raw fruits and vegetables,  
116 sewage, and soil (Zimmermann, 1976; Swai and Schoonman, 2009; Alvarado-Esquivel et al.,  
117 2010; Alvarado-Esquivel et al., 2011; Gómez-Marín et al., 2012; Sang-Eun et al., 2014).  
118 Veterinary personnel are considered at a higher risk of getting infected in clinical settings  
119 (Tizard and Caoili, 1976) and not adopting personnel protective measures (wearing gloves,  
120 lab coats, coveralls) are the potential risk factors for toxoplasmosis.  
121 Toxoplasmosis is endemic in India. Several studies have documented *Toxoplasma* exposure  
122 in humans (Dhumne et al., 2007; Singh et al., 2014) and animal hosts (Singh et al., 2010;  
123 Thakur et al., 2019). Jani and colleagues (RG et al., 2006) reported 15% (n=60)  
124 seroprevalence of toxoplasmosis in zoo workers in western India; higher sero-prevalence was  
125 seen in zoo attendants working with feline animals followed by reptiles (RG et al., 2006).  
126 As far as we are aware, occupational exposure of *T. gondii* has not been systematically  
127 explored from north India. In view of this, the current study was planned to determine

128 seroprevalence and risk factor investigation for the exposure of *T. gondii* in veterinary  
129 personnel in Punjab, India.

## 130 **Methods**

### 131 *Ethics statement*

132 The current study was approved by Institutional Ethics Committee, Dayanand Medical  
133 College & Hospital, Ludhiana, Punjab (Ethics approval number: DMCH/ R&D/2018/683)

### 134 *Study area*

135 Punjab (Latitude of 30°4'N and Longitude 75° 5' E), a north Indian state having 22 districts,  
136 is home to 27.7 million people(COI, 2011). The state has a livestock population of 8.12  
137 million primarily consisting of cattle (2.43 million) and buffalo (5.16 million)(BAHS, 2014).  
138 Other important livestock species reared in the state include sheep (n=128534), goat  
139 (n=327272) and pigs (n=32,221) (BAHS, 2014). No objective information on the number of  
140 cats is available, although both stray and pet cats reside in the state.

### 141 *Target and study population*

142 The target population consisted of veterinary personnel (Professor/academicians, veterinary  
143 doctors, veterinary pharmacists, animal attendants) and students working with livestock in  
144 Punjab. As per official data, there were 772 veterinarians, 1762 veterinary pharmacists and  
145 2316 animal attendants serving in the Department of Animal Husbandry, Dairying and  
146 Fisheries (DAHDF), Government of Punjab(DAHP, 2012). In addition, there are  
147 approximately 500 veterinary students (4<sup>th</sup> and final year of undergraduate course, Masters  
148 and PhD students) and clinical veterinary complex faculty (Pers commun J. Singh)  
149 comprising a total population of 5350 veterinary personnel in Punjab.

150 The study population consisted of all the veterinary personnel working in the DAHDF in  
151 Ludhiana district of the state, fourth and final year undergraduate, masters and PhD students

152 enrolled in College of Veterinary Sciences and clinical veterinary complex faculty, Guru  
153 Angad Dev Veterinary & Animal Sciences University, Ludhiana.

#### 154 *Sample size*

155 Assuming a seroprevalence of 14% as reported for the general public (Dhumne et al., 2007)  
156 and a population size of 600, the study would have required a sample size of 142 for  
157 estimating the prevalence with 5% absolute precision and 95% confidence (NK and MS,  
158 2014). After considering potential clustering at the subdistrict level using a design effect of  
159 1.5, a sample size 213 was required. However, with no prior information on the disease  
160 prevalence and level of clustering, all those subjects who consented to participate were  
161 enrolled.

#### 162 *Enrolment*

163 A cover letter and participant information statement briefly describing objectives of the study  
164 were provided to the veterinary personnel working in district Ludhiana. Veterinary personnel  
165 were contacted during alumni meet and during their monthly meetings. A formal letter was  
166 displayed on notice board of the college of veterinary science as well as student hostel(s)  
167 explaining objectives of this study and requesting the students to participate in this study.  
168 Lastly, academicians working in clinical veterinary complex, GADVASU were personally  
169 invited. Those who consented to participate were enrolled in the study.

#### 170 *Blood Sampling*

171 Five ml of blood was collected from each participant in 2017-18. Serum was separated from  
172 clotted blood by centrifuging at 1,200 rpm for 10 min and stored in screw-caped sterilized  
173 vials at -20°C until further testing.

#### 174 *Questionnaire design*

175 A detailed questionnaire was designed to collect information on demography and putative  
176 risk factors associated with *T. gondii* infection in veterinary personnel. Information on  
177 demography, risk of occupational exposure, past incidence, perception and practices  
178 associated with toxoplasmosis were included. The questionnaire was available in two  
179 languages: English and Punjabi (local language of the state).

### 180 ***Laboratory testing***

181 The commercially available NovaLisa™ *T. gondii* IgG and IgM capture- ELISA kits  
182 manufactured by NovaLisa™, GenWay Biotech, Inc. 6777 Nancy Ridge Drive San Diego,  
183 CA were procured. The IgG and IgM ELISAs were carried out as per manufacturer's  
184 instructions.

185 The results of IgG ELISA were quantified in IU/ml. The mean absorbance values (on the  
186 vertical y-axis) of the four standards A, B, C and D (provided in IgG ELISA kit) were plotted  
187 against their corresponding concentrations (0, 50, 100 and 200 IU/ml) (on the horizontal x-  
188 axis) and a calibration curve was drawn. Linear regression was used for each test serum  
189 sample for obtaining quantitative results of IgG ELISA in IU/ml. Results were interpreted as  
190 (a) reactive (> 35 IU/ml), (b) grey zone/equivocal (30 – 35 IU/ml) and (c) non-reactive (< 30  
191 IU/ml).

192 The IgM ELISA results were interpreted as per the formula provided in manufacturer's  
193 guidelines.

$$[\text{NovaTec Units} = \text{NTU}] = \frac{\text{Patient (mean) absorbance value} \times 10}{\text{Cut - off value}}$$

194

195 Test serum samples having a cut off value greater than 11 NTU were considered as positive,  
196 9–11 NTU as equivocal and less than 9 NTU were considered negative. The samples within



197 equivocal zones were reported as inconclusive cases as antibodies against pathogen could not  
198 be clearly detected.

### 199 *Outcome variable*

200 A human subject was considered as *Toxoplasma* seropositive by using the combination of  
201 tests in parallel, i.e. if person was seropositive in either *Toxoplasma* IgG or IgM ELISA  
202 (Table 1).

### 203 *Explanatory variables*

204 A total of thirty–one explanatory variables were considered in this study (Supplementary  
205 appendix): demographic (eight variables), non-occupational (eleven variables) and  
206 occupational risk exposure variables (twelve variables). Occupational risk exposure variables  
207 included animal cases handled (species wise) and personal protective equipment (PPE) use.  
208 Information on non-occupational exposure, for example having cat as a pet, gardening  
209 practices, meat preferences and habit of consuming raw vegetables and fruits, were also used.

### 210 *Statistical analyses*

211 The apparent and true seroprevalence of toxoplasmosis with 95% confidence interval (CI)  
212 were determined using the given diagnostic sensitivity and specificity of the ELISA kits. The  
213 given diagnostic sensitivity and specificity of IgG ELISA was 96.6% and 98.2%,  
214 respectively, and that of IgM ELISA was be 95.8% and 100.0%, respectively. Apparent and  
215 true seroprevalence were calculated using Epi Tools (Rogan and Gladen, 1978; Brown et al.,  
216 2001; Sergeant, 2018).

### 217 *Descriptive and univariable analysis*

218 Descriptive, univariable and multivariable analyses were conducted in R statistical program  
219 (R statistical package version 3.4.0, R Development Core Team [2015], [http://www.r-](http://www.r-project.org)  
220 [project.org](http://www.r-project.org)).

221 Descriptive analyses of all the variables were performed. The continuous variables ‘age’ and  
222 ‘years in veterinary practice’ were not normally distributed, and hence were categorised by  
223 using their quartiles. Fisher’s exact test (one tailed) was conducted when assumptions of Chi-  
224 squared test were not met. Variables in the univariable analyses having a likelihood ratio chi-  
225 square p-value of <0.25 and having less than 10% missing values were included for  
226 multivariable model building.

### 227 ***Multivariable analyses***

228 We constructed a mixed effects logistic regression model using forward selection (likelihood  
229 ratio), stepwise approach. The variable ‘region’ was used as a random effect to account for  
230 clustering at this level. The explanatory variables having a p-value of <0.05 were retained and  
231 those having p-value >0.25 in the univariable analysis were tested in the final model.

232 Generalized variable inflation factor (GVIF) was estimated to determine multicollinearity in  
233 the final model and the variables having  $GVIF^{1/(2*Df)}$  more than 2 were eliminated.

234 Variables in the final model were tested for biologically important two-way interactions.

235 Model adequacy was determined using the likelihood ratio chi-squared goodness-of-fit  
236 statistic and residuals.

## 237 **Results**

### 238 ***Apparent and estimated true seroprevalence***

239 The apparent and estimated true seroprevalence of *T. gondii* antibodies using IgG ELISA was  
240 found to be 8.78% (95% CI: 5.63%–13.45%) and 7.36% (95% CI: 4.04%–12.29%),  
241 respectively (Table 1). The apparent and estimated true seroprevalence using IgM ELISA  
242 was found to be 0.49% (95% CI: Inestimable–2.71%) and 0.51% (95% CI: Inestimable–  
243 2.83%), respectively.

244 Frequency distributions of the 31 categorical explanatory variables have been reported in  
245 Table S1. Overall, 205 veterinary personnel participated in this study. There were 10.2%

246 academicians, 30.2% veterinary doctors, 17.6% veterinary pharmacists, 29.7% veterinary  
247 students and 12.2% animal attendants/class IV employees. Most of the participants reside in  
248 urban (71.2%) as compared to rural (28.8%) areas. Most of the participants were running  
249 mixed (handling both small and large animals – 87.32%) practice. More than 30% of the  
250 participants handled cat cases in past three months and approximately 6.0% of the  
251 participants contacted cat faeces in the last three months.

### 252 ***Univariable results***

253 Univariable results for the explanatory variables with the outcome variable having a p-value  
254 of less than 0.25 are presented in Table 2. Information for the remaining explanatory  
255 variables is presented in Supplementary appendix. Consuming mutton (p=0.029) and type of  
256 treatment of drinking water (p=0.017) were strongly associated with the outcome variable.

### 257 ***Multivariable results***

258 The final multivariable model for *Toxoplasma* seropositive is presented in Table 3. After  
259 adjusting for other variables in the final model, consuming sheep meat and keeping cat as a  
260 pet were associated with large odds of having a positive test (Table 3).

### 261 **Discussion**

262 This is the first study conducted systematically to determine seroprevalence and risk factor  
263 investigation for the exposure of *T. gondii* among veterinary personnel in north India. As far  
264 as we are aware, no studies to capture occupational exposure in veterinary personnel except  
265 one from western India (reporting 15% *Toxoplasma* seropositivity in zoo workers) have been  
266 conducted (RG et al., 2006). We believe such studies are required to aware and safeguard  
267 veterinary workforce from occupationally acquired diseases.

268 We estimated apparent seroprevalence of *T. gondii* antibodies using IgG ELISA to be 8.78%  
269 (95% CI: 5.63%–13.45%) in veterinary personnel in Punjab, India. Previous studies report

270 presence of anti-*Toxoplasma gondii* antibodies (IgG or IgM) in 5% to 80% human  
271 populations in India (Khan et al., 2017). Lower seroprevalence estimates might be due to the  
272 fact that most of the veterinary personnel and students are well-aware of transmission risk of  
273 *Toxoplasma* and maintain high personal hygiene. In addition, significantly drier conditions in  
274 this region lower the survival of *T. gondii* oocysts (Dhumne et al., 2007).

275 We report that occupational exposure does not play an important role for the exposure of  
276 toxoplasmosis in veterinary personnel in Punjab state of India. Most of the known  
277 occupational risk factors such as type of practice, handling felines and cat faeces, and  
278 handling abortion cases were not significant in this study. However, this could not be  
279 absolutely ruled out. The single individual was IgM seropositive; he had no pet cat but had  
280 been handling abortion cases. We believe that this needs to be further investigated. Similarly,  
281 Sadaghian and Jafari (Sadaghian and Jafari, 2016) reported that toxoplasmosis is not  
282 occupationally related to veterinary laboratory science students. On the other hand, several  
283 studies have reported significant occupational risk of toxoplasmosis (Siponen et al., 2019).  
284 For example, occupational risks such as veterinarians living in rural areas, and not doing  
285 small animal practice were reported to be associated with *Toxoplasma* seropositive status in  
286 Finnish veterinary professionals (Siponen et al., 2019).

287 We found non-occupational risk factors e.g keeping cat as a pet and consuming sheep meat to  
288 be significantly associated with *Toxoplasma* seropositive status. Similarly, several non-  
289 occupational risk factors have been identified in the transmission of *T. gondii*. Jones and  
290 colleagues (Jones et al., 2009) identified important risks for the exposure to *Toxoplasma*  
291 including owning cats, and eating raw or uncooked pork, lamb, mutton, beef, game or  
292 mincemeat products to recently infected persons in Brazil. Dong and colleagues (Dong et al.,  
293 2018) also reported eating raw or undercooked meat and low level of risk to be important

294 factors for toxoplasmosis. However, they also reported butchers, animal traffickers and  
295 zookeepers at a higher risk for toxoplasmosis.

296 Our study had certain limitations. We could not compare disease prevalence and risk with  
297 general public and other occupations such as meat handlers and cat owners. In addition, we  
298 have not tested veterinary personnel from other districts of the state. However, we believe  
299 that similar livestock production and animal husbandry practices exist across the state and  
300 this will not affect the overall results of this study.

301 Overall, we report a low seroprevalence of toxoplasmosis as compared to previous studies  
302 conducted on general public or non-occupationally exposed persons in India. The results  
303 reassure veterinary personnel that their occupational exposure does not enhance risk of  
304 getting infected with *T. gondii*. However, owning cat and consuming mutton are related with  
305 *Toxoplasma* seropositivity in Punjab, India.

## 306 **References**

307 Ajzenberg, D., Bañuls, A.-L., Tibayrenc, M., Dardé, M.L., 2002. Microsatellite analysis of  
308 *Toxoplasma gondii* shows considerable polymorphism structured into two main  
309 clonal groups. *International Journal for Parasitology* 32, 27-38.

310 Alvarado-Esquivel, C., Estrada-Martínez, S., Liesenfeld, O., 2011. *Toxoplasma gondii*  
311 infection in workers occupationally exposed to unwashed raw fruits and vegetables: a  
312 case control seroprevalence study. *Parasites Vectors* 4, 235.

313 Alvarado-Esquivel, C., Liesenfeld, O., Márquez-Conde, J.A., Estrada-Martínez, S., Dubey,  
314 J.P., 2010. Seroepidemiology of infection with *Toxoplasma gondii* in workers  
315 occupationally exposed to water, sewage, and soil in Durango, Mexico. *The Journal*  
316 *of parasitology* 96, 847-850.

317 BAHS, 2014. 19th Livestock Census–2012. New Delhi.

- 318 Black, M.W., Boothroyd, J.C., 2000. Lytic cycle of *Toxoplasma gondii*. *Microbiology and*  
319 *molecular biology reviews* : MMBR 64, 607-623.
- 320 Brown, L., Cat, T., A, D., 2001. Interval Estimation for a proportion. *Statistical Science* 16,  
321 101–133.
- 322 COI, 2011. *Census of India*, 2011. .
- 323 DAHP, 2012. *Department of Animal Husbandry Punjab*.
- 324 Dhumne, M., Sengupta, C., Kadival, G., Rathinaswamy, A., Velumani, A., 2007. National  
325 Seroprevalence of *Toxoplasma gondii* in India. *The Journal of Parasitology* 93, 1520-  
326 1521.
- 327 Dong, H., Su, R., Lu, Y., Wang, M., Liu, J., Jian, F., Yang, Y., 2018. Prevalence, Risk  
328 Factors, and Genotypes of in Food Animals and Humans (2000-2017) From China.  
329 *Frontiers in microbiology* 9, 2108.
- 330 Dubey, J.P., Frenkel, J.K., 1972. Cyst-induced toxoplasmosis in cats. *The Journal of*  
331 *protozoology* 19, 155-177.
- 332 Flegr, J., Prandota, J., Sovickova, M., Israili, Z.H., 2014. Toxoplasmosis - A Global Threat.  
333 Correlation of Latent Toxoplasmosis with Specific Disease Burden in a Set of 88  
334 Countries.(Research Article). *PLoS One* 9, e90203.
- 335 Frenkel, J.K., Dubey, J.P., Miller, N.L., 1970. *Toxoplasma gondii* in cats: fecal stages  
336 identified as coccidian oocysts. *Science (New York, N.Y.)* 167, 893-896.
- 337 Gómez-Marín, J.E., de-La-Torre, A., Barrios, P., Cardona, N., Álvarez, C., Herrera, C., 2012.  
338 Toxoplasmosis in military personnel involved in jungle operations. *Acta Trop.* 122,  
339 46-51.
- 340 Hill, D., Dubey, J.P., 2002. *Toxoplasma gondii*: transmission, diagnosis and prevention.  
341 *Clinical Microbiology and Infection* 8, 634-640.

- 342 Hussain, M.A., Stitt, V., Szabo, E.A., Nelan, B., 2017. *Toxoplasma gondii* in the Food  
343 Supply. *Pathogens* (Basel, Switzerland) 6.
- 344 Jones, J.L., Dargelas, V., Roberts, J., Press, C., Remington, J.S., Montoya, J.G., 2009. Risk  
345 factors for *Toxoplasma gondii* infection in the United States. *Clinical infectious  
346 diseases : an official publication of the Infectious Diseases Society of America* 49,  
347 878.
- 348 Khan, M.U., Rashid, I., Akbar, H., Islam, S., Riaz, F., Nabi, H., Ashraf, K., Singla, L.D.,  
349 2017. Seroprevalence of *Toxoplasma gondii* in South Asian countries. *Revue  
350 scientifique et technique (International Office of Epizootics)* 36, 981-996.
- 351 Montoya, J., Liesenfeld, O., 2004. Toxoplasmosis. *The Lancet* 363, 1965-1976.
- 352 NK, D., MS, K., 2014. Statulator: An online statistical calculator. Sample Size Calculator for  
353 Estimating a Single Proportion.
- 354 Pappas, G., Roussos, N., Falagas, M.E., 2009. Toxoplasmosis snapshots: Global status of  
355 *Toxoplasma gondii* seroprevalence and implications for pregnancy and congenital  
356 toxoplasmosis. *International Journal for Parasitology* 39, 1385-1394.
- 357 Remington, J.S., Jacobs, L., Kaufman, H.E., 1960. Toxoplasmosis in the Adult. *New England  
358 Journal of Medicine* 262, 237-241.
- 359 RG, J., CN, B., RD, K., G, B., D, V., 2006. Study of seroprevalence of Toxoplasmosis in  
360 workers of Zoological Gardens of Gujarat. *Intas Polivet* 7, 3.
- 361 Robert-Gangneux, F., Dardé, M.-L., 2012. Epidemiology of and Diagnostic Strategies for  
362 Toxoplasmosis. *Clin. Microbiol. Rev.* 25, 264.
- 363 Rogan, W., Gladen, B., 1978. Estimating Prevalence from the Results of a Screening Test.  
364 *Am. J. Epidemiol.* 107, 71.

- 365 Sadaghian, M., Jafari, R., 2016. Prevalence of Toxoplasma infection in veterinary laboratory  
366 sciences students comparing to ordinary people: a case-control study. *Journal of*  
367 *Parasitic Diseases* 40, 768-771.
- 368 Sang-Eun, L., Hong, S.-H., Jeong, Y.-I., Lee, J.-H., Yoo, S.-J., Lim, H.-S., Lee, W.-J., Cho,  
369 S.-H., 2014. Cross-sectional analysis of the seropositivity and risk factors of  
370 *Toxoplasma gondii* infection among veterinarians, in relation to their public  
371 professional activities. *Vet. Parasitol.* 203, 29-34.
- 372 Sergeant, E., 2018. *Epitools Epidemiological Calculators*. Ausvet. .
- 373 Singh, B.B., Sharma, R., Sharma, J.K., Juyal, P.D., 2010. Parasitic zoonoses in India: an  
374 overview. *Revue scientifique et technique (International Office of Epizootics)* 29,  
375 629-637.
- 376 Singh, S., Munawwar, A., Rao, S., Mehta, S., Hazarika, N.K., 2014. Serologic prevalence of  
377 *Toxoplasma gondii* in Indian women of child bearing age and effects of social and  
378 environmental factors.(Report). *Plos Neglect. Trop. Dis.* 8.
- 379 Siponen, A.-M., Kinnunen, P.M., Koort, J., Kallio-Kokko, H., Vapalahti, O., Virtala, A.-M.,  
380 Jokelainen, P., 2019. *Toxoplasma gondii* seroprevalence in veterinarians in Finland:  
381 Older age, living in the countryside, tasting beef during cooking and not doing small  
382 animal practice associated with seropositivity. *Zoonoses Public Health* 66, 207.
- 383 Swai, E.S., Schoonman, L., 2009. Seroprevalence of *Toxoplasma gondii* infection amongst  
384 residents of Tanga district in north-east Tanzania. *Tanzania journal of health research*  
385 11, 205-209.
- 386 Thakur, R., Sharma, R., Aulakh, R., Gill, J., Singh, B., 2019. Prevalence, molecular detection  
387 and risk factors investigation for the occurrence of *Toxoplasma gondii* in slaughter  
388 pigs in North India. *BMC Vet. Res.* 15, 1-7.



389 Tizard, I.R., Caoili, F.A., 1976. Toxoplasmosis in veterinarians: an investigation into possible  
390 sources of infection. *The Canadian veterinary journal = La revue veterinaire*  
391 *canadienne* 17, 24-25.

392 Torgerson, P.R., Mastroiacovo, P., 2013. The global burden of congenital toxoplasmosis: a  
393 systematic review. *Bulletin of the World Health Organization* 91, 501-508.

394 Wang, Z.-D., Wang, S.-C., Liu, H.-H., Ma, H.-Y., Li, Z.-Y., Wei, F., Zhu, X.-Q., Liu, Q.,  
395 2017. Prevalence and burden of *Toxoplasma gondii* infection in HIV-infected people:  
396 a systematic review and meta-analysis. *The Lancet HIV* 4, e177-e188.

397 Weiss, L.M., Dubey, J.P., 2009. Toxoplasmosis: A history of clinical observations.  
398 *International Journal for Parasitology* 39, 895-901.

399 Zimmermann, W.J., 1976. Prevalence of *Toxoplasma gondii* antibodies among veterinary  
400 college staff and students, Iowa State University. *Public health reports (Washington,*  
401 *D.C. : 1974)* 91, 526-532.

402

403

404

405

406

407 **Table 1. Apparent and estimated true seroprevalence of *T. gondii* antibodies using IgG ELISA in veterinary personnel and students in**  
 408 **Punjab, India**

| Category                                                    | Number inspected | Number positive | Apparent prevalence | 95% CI       | Estimated prevalence | true 95% CI         |
|-------------------------------------------------------------|------------------|-----------------|---------------------|--------------|----------------------|---------------------|
| <b>Veterinary personnel (working in field areas)</b>        |                  |                 |                     |              |                      |                     |
| Veterinary Doctors                                          | 62               | 4               | 6.45%               | 2.54%–15.45% | 4.91%                | 0.78%–14.4%         |
| Veterinary Pharmacists                                      | 36               | 2               | 5.56%               | 1.54%–18.14% | 3.96%                | Inestimable–17.24%  |
| Animal attendants                                           | 25               | 4               | 16.0%               | 6.4%–34.65%  | 14.98%               | 4.86%–34.66%        |
| <b>Veterinary students</b>                                  |                  |                 |                     |              |                      |                     |
| BVSc & AH 4 <sup>th</sup> year                              | 13               | 1               | 7.69%               | 1.37%–33.31% | 6.22%                | Inestimable –33.24% |
| BVSc & AH 5 <sup>th</sup> year                              | 13               | 1               | 7.69%               | 1.37%–33.31% | 6.22%                | Inestimable –33.24% |
| M.VSc                                                       | 26               | 1               | 3.85%               | 0.68%–18.89% | 2.16%                | Inestimable –18.03% |
| PhD                                                         | 9                | 1               | 11.11%              | 1.99%–43.5%  | 9.82%                | Inestimable –43.99% |
| <b>Veterinary University Academicians/faculty/Professor</b> |                  |                 |                     |              |                      |                     |

|                       |     |    |        |               |        |                     |
|-----------------------|-----|----|--------|---------------|--------|---------------------|
| Faculty               | 21  | 4  | 19.05% | 7.67%–40.0%   | 18.19% | 6.19%–40.3%         |
| Total                 | 205 | 18 | 8.78%  | 5.63%–13.45%  | 7.36%  | 4.04%–12.29%        |
| <b>Age (in years)</b> |     |    |        |               |        |                     |
| 21–30                 | 110 | 7  | 6.36%  | 3.12%–12.56%  | 4.81%  | 1.39%–11.35%        |
| 31–40                 | 45  | 5  | 11.11% | 4.84%–23.5%   | 9.82%  | 3.21%–22.89%        |
| 41–50                 | 30  | 1  | 3.33%  | 0.59%–16.57%  | 1.62%  | Inestimable –15.69% |
| 51–60                 | 20  | 5  | 25.0%  | 11.19%–46.87% | 24.47% | 9.9%–47.54%         |

410 **Table 2. Contingency tables and univariable results (variables having  $p < 0.25$ ) for**  
 411 ***Toxoplasma* seropositivity (IgG and IgM ELISA) in a study of 205 veterinary personnel**  
 412 **conducted in India in 2017–18.**

| Parameter                           | Categories                    | Test Outcome        |                           | Odds Ratio         | p-value |
|-------------------------------------|-------------------------------|---------------------|---------------------------|--------------------|---------|
|                                     |                               | (IgG and IgM ELISA) | (95% Confidence Interval) |                    |         |
|                                     |                               | Negative            | Positive                  |                    |         |
| Age (in years)                      | 21–25                         | 56                  | 3                         | Referent           |         |
|                                     | 25–30                         | 47                  | 4                         | 1.06 (0.23–5.0)    | 0.152   |
|                                     | 30–40                         | 40                  | 5                         | 1.12 (0.24–5.25)   |         |
|                                     | 40–58                         | 43                  | 7                         | 3.35 (0.97–11.6)   |         |
| Region**                            | Majha and Doaba               | 32                  | 1                         | Referent           | 0.074   |
|                                     | Malwa I                       | 39                  | 1                         | 0.82 (0.01–66.36)  |         |
|                                     | Malwa II                      | 115                 | 17                        | 4.70 (0.68–203.61) |         |
| Highest educational qualification** | Bachelor’s veterinary science | in 49               | 5                         | Referent           | 0.16    |

| Parameter                        | Categories                            | Test Outcome            |                                 | Odds Ratio<br>(95% Confidence Interval) | p-value |
|----------------------------------|---------------------------------------|-------------------------|---------------------------------|-----------------------------------------|---------|
|                                  |                                       | (IgG ELISA)<br>Negative | and IgM (95% ELISA)<br>Positive |                                         |         |
|                                  | Master's<br>veterinary science        | in 56                   | 2                               | 0.35 (0.03–2.27)                        |         |
|                                  | 10 <sup>th</sup> grade                | 20                      | 3                               | 1.46 (0.20–8.36)                        |         |
|                                  | PhD                                   | 26                      | 6                               | 2.23 (0.51–10.24)                       |         |
|                                  | Diploma<br>veterinary science         | in 35                   | 3                               | 0.84 (0.12–4.66)                        |         |
| Occupation**                     | Academician                           | 16                      | 5                               | Referent                                |         |
|                                  | Veterinary doctor                     | 58                      | 4                               | 0.22 (0.04–1.18)                        | 0.097   |
|                                  | Veterinary<br>pharmacist              | 34                      | 2                               | 0.19 (0.017–1.34)                       |         |
|                                  | Veterinary student                    | 57                      | 4                               | 0.23 (0.04–1.20)                        |         |
|                                  | Animal<br>Attendant/class<br>employee | 21<br>IV                | 4                               | 0.62 (0.104–3.39)                       |         |
| Total time in practice (in 0.5–2 |                                       | 61                      | 4                               | Referent                                | 0.15    |

| Parameter                                              | Categories | Test Outcome                |                                               | Odds Ratio        | p-value |
|--------------------------------------------------------|------------|-----------------------------|-----------------------------------------------|-------------------|---------|
|                                                        |            | (IgG and ELISA)<br>Negative | and IgM (95% Confidence Interval)<br>Positive |                   |         |
| years)                                                 | 2–6        | 43                          | 3                                             | 1.06 (0.23–5.0)   |         |
|                                                        | 6–17       | 41                          | 3                                             | 1.12 (0.24–5.25)  |         |
|                                                        | 17–37      | 41                          | 9                                             | 3.35 (0.97–11.6)  |         |
| Did you handle cat clinical cases in past three months | No         | 132                         | 10                                            | Referent          | 0.11    |
|                                                        | Yes        | 54                          | 9                                             | 2.2 (0.85–5.71)   |         |
| Do you have cat as a pet**                             | No         | 183                         | 17                                            | Referent          | 0.07    |
|                                                        | Yes        | 3                           | 2                                             | 7.04 (0.55–66.16) |         |
| Do you consume mutton                                  | No         | 136                         | 9                                             | Referent          | 0.025   |
|                                                        | Yes        | 50                          | 10                                            | 3.02 (1.16–7.87)  |         |

| Parameter                                  | Categories             | Test Outcome                |                                           | Odds Ratio        | p-value |
|--------------------------------------------|------------------------|-----------------------------|-------------------------------------------|-------------------|---------|
|                                            |                        | (IgG and ELISA)<br>Negative | IgM (95% Confidence Interval)<br>Positive |                   |         |
| Do you consume chevon                      | No                     | 122                         | 8                                         | Referent          | 0.047   |
|                                            | Yes                    | 64                          | 11                                        | 2.62 (1.0–6.84)   |         |
| Do you consume pork**                      | No                     | 183                         | 17                                        | Referent          | 0.07    |
|                                            | Yes                    | 3                           | 2                                         | 7.04 (0.55–66.16) |         |
| Type of treatment done to drinking water** | Boiling                | 3                           | 2                                         | Referent          | 0.017   |
|                                            | Candle filter          | 19                          | 4                                         | 0.33 (0.02–5.18)  |         |
|                                            | Reverse osmosis filter | 142                         | 11                                        | 0.12 (0.01–1.57)  |         |

413 \*\*Fisher's exact test was conducted

414

415

416

417

418

419

420

421

422

423

424

425

426

427

428

429

430

431 **Table 3. Final multivariable model for *Toxoplasma* seropositive outcome in a study of**  
432 **205 veterinary personnel and students conducted in Punjab, India in 2017–18.**

| <b>Parameter</b>               | <b>b</b> | <b>SE(b)</b> | <b>Odds ratios</b> | <b>LCL</b> | <b>UCL</b> | <b>P</b> |
|--------------------------------|----------|--------------|--------------------|------------|------------|----------|
| constant                       | -3.28    | 0.67         | 1.0                |            |            | <0.001   |
| Consume sheep meat (Yes vs No) | 1.16     | 0.16         | 3.20               | 1.18       | 8.69       | 0.02     |
| Keeping cat as a pet           | 2.35     | 1.05         | 10.45              | 1.33       | 82.27      | 0.03     |



(Yes vs

No)

---

433

434

435
